# Supplementary material
Source: MDPI journal article supplement (https://www.mdpi.com/2072-4292/13/12/2415)
Supplement: s1 [file s1]

# Supplementary Material for

Investigating the temporal and spatial dynamics of Human Development

Index: A comparative study on countries and regions in the Eastern

Hemisphere from the perspective of evolution

**Hanwei Liang<sup>1,2</sup>, Na Li<sup>1</sup>, Ji Han<sup>3,4,\*</sup>, Xin Bian<sup>1</sup>, Huaixia Xia<sup>1</sup> and Liang Dong<sup>5,\*</sup>**

<sup>1</sup> Collaborative Innovation Center on Forecast and Evaluation of Meteorological Disasters (CIC-FEMD), School of Geographical Sciences, Nanjing University of Information Science and Technology (NUIST), Nanjing 210044, China

<sup>2</sup> Key Laboratory of Coastal Zone Exploitation and Protection, Ministry of Natural Resources, Nanjing 210024, China

<sup>3</sup> Shanghai Key Lab for Urban Ecological Processes and Eco-Restoration, School of Ecological and Environmental Sciences, East China Normal University, Dongchuan Rd. 500, Shanghai 200241, China

<sup>4</sup> Institute of Eco-Chongming, 3663 N. Zhongshan Rd., Shanghai 200062, China

<sup>5</sup> Department of Public Policy, and School of Energy and Environment, City University of Hong Kong, Hong Kong SAR 999077, China

\* Correspondence: liadong@cityu.edu.hk (L.D.); jhan@re.ecnu.edu.cn (J.H.); Tel.: +852 34426221 (L.D.)

## Supplementary Material

In this supplementary material, the second-order regression models for nighttime lights data are listed.

**Table S1.** Coefficients of the second-order regression models for nighttime lights data.

| Satellite | Year | a      | b     | c      |
|-----------|------|--------|-------|--------|
| F10       | 1992 | -0.009 | 1.590 | -2.057 |
|           | 1993 | -0.009 | 1.598 | -1.058 |
|           | 1994 | -0.008 | 1.486 | -0.346 |
| F12       | 1994 | -0.003 | 1.177 | -0.689 |
|           | 1995 | -0.004 | 1.229 | -0.052 |
|           | 1996 | -0.004 | 1.273 | -0.096 |
|           | 1997 | -0.003 | 1.178 | -0.332 |
|           | 1998 | -0.001 | 1.065 | -0.061 |
|           | 1999 | 0.000  | 1.000 | 0.000  |
| F14       | 1997 | -0.012 | 1.770 | -1.132 |

| Satellite | Year | a      | b     | c      |
|-----------|------|--------|-------|--------|
|           | 1998 | -0.010 | 1.632 | -0.192 |
|           | 1999 | -0.008 | 1.506 | -0.156 |
|           | 2000 | -0.005 | 1.316 | 1.099  |
|           | 2001 | -0.005 | 1.322 | 0.194  |
|           | 2002 | -0.004 | 1.191 | 1.052  |
|           | 2003 | -0.004 | 1.242 | 0.739  |
| F15       | 2000 | -0.001 | 1.045 | 0.125  |
|           | 2001 | -0.001 | 1.108 | -0.702 |
|           | 2002 | 0.001  | 0.957 | 0.049  |
|           | 2003 | -0.008 | 1.512 | 0.222  |
|           | 2004 | -0.005 | 1.334 | 0.575  |
|           | 2005 | -0.004 | 1.284 | 0.637  |
|           | 2006 | -0.004 | 1.279 | 0.826  |
|           | 2007 | -0.005 | 1.297 | 1.361  |
| F16       | 2004 | -0.003 | 1.196 | 0.285  |
|           | 2005 | -0.006 | 1.416 | 0.000  |
|           | 2006 | -0.002 | 1.137 | 0.107  |
|           | 2007 | 0.001  | 0.911 | 0.639  |
|           | 2008 | 0.000  | 0.993 | 0.556  |
|           | 2009 | -0.002 | 1.068 | 0.949  |
| F18       | 2010 | 0.007  | 0.510 | 2.343  |
|           | 2011 | 0.003  | 0.735 | 1.896  |
|           | 2012 | 0.005  | 0.620 | 1.875  |
|           | 2013 | 0.000  | 0.929 | 0.462  |
